# Supplementary material for: Quaternary type IV deep eutectic solvent-based tungsten oxide/niobium oxide photochromic and reverse fading composite complex
Source: Royal Society of Chemistry journal article supplement (doi:10.1039/d1nj02461b), 2021-01-01
Supplement: d1nj02461b1.pdf [file d1nj02461b1.pdf]

**New Journal Of Chemistry**

**Quaternary Type IV Deep Eutectic Solvent-Based WO<sub>3</sub>/Nb<sub>2</sub>O<sub>5</sub> Photochromic and Reverse Fading Composite Complex**

Onome Ejeromedoghene<sup>a</sup>, Xiangyu Ma<sup>a</sup>, Olayinka Oderinde<sup>b</sup>, Fang Yao<sup>a</sup>, Sheriff Adewuyi<sup>c</sup> and Guodong Fu<sup>a\*</sup>

<sup>a</sup> School of Chemistry and Chemical Engineering, Southeast University, Jiangning District, Nanjing, Jiangsu Province, 211189, PR China

<sup>b</sup> Department of Chemical Sciences, Faculty of Basic Medical and Applied Sciences, Lead City University, Ibadan, Nigeria.

<sup>c</sup> Department of Chemistry, College of Physical Sciences, Federal University of Agriculture, PMB 2240, Abeokuta, Ogun State, Nigeria.

Corresponding author: [101010855@seu.edu.cn](mailto:101010855@seu.edu.cn), [fu7352@seu.edu.cn](mailto:fu7352@seu.edu.cn) (G. Fu).

Tel.: +86-25-52090625; Fax: +86-25-52090625

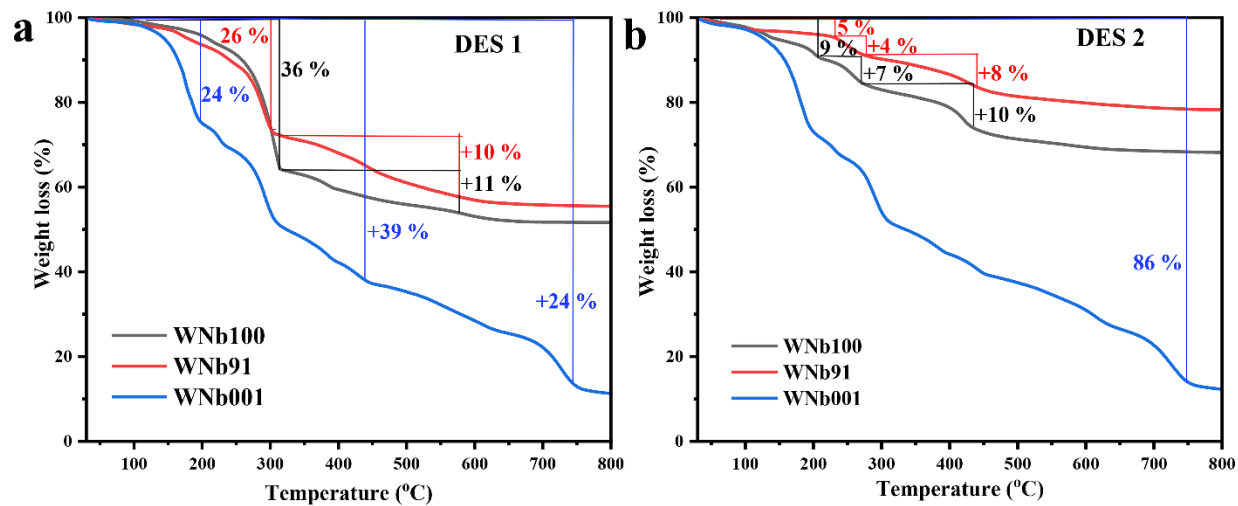

**Fig. S1** Thermogravimetric curves of (a) DES 1 – based metallic complexes (b) DES 2 – based metallic complexes.

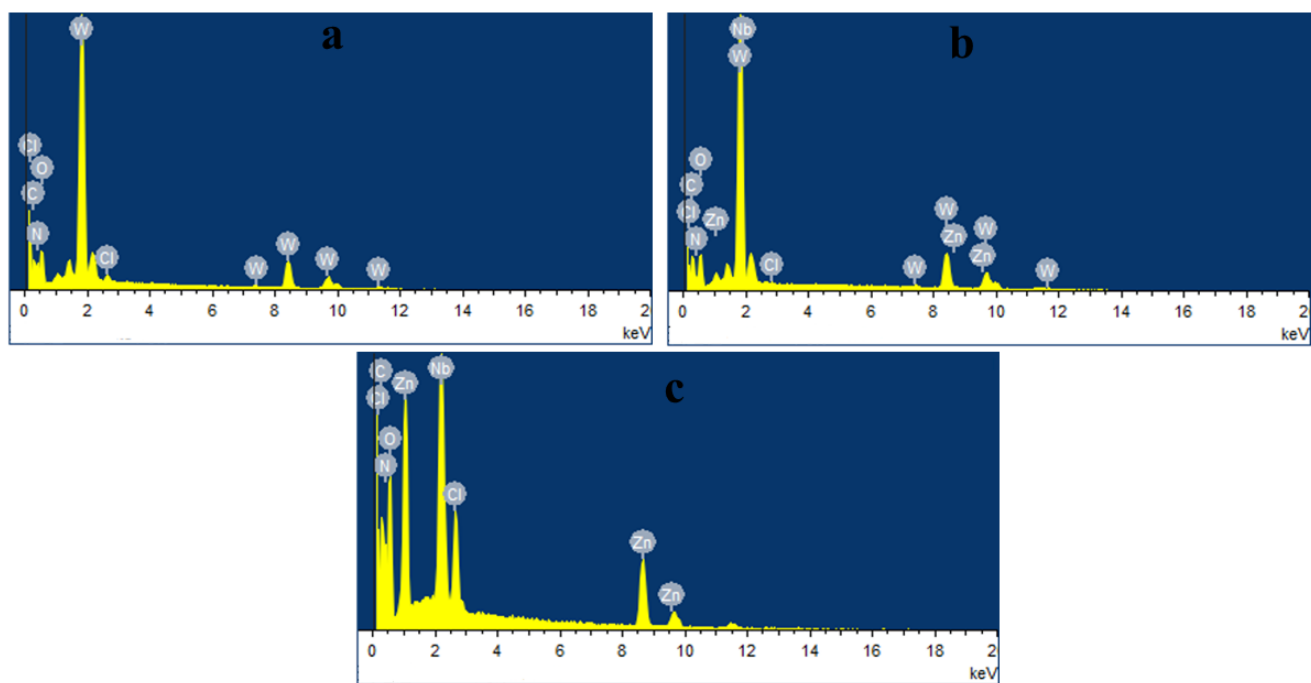

**Fig. S2** EDX spectra of (a) DES 1-WNb100 (b) DES 1-WNb91 (c) DES 1-WNb001

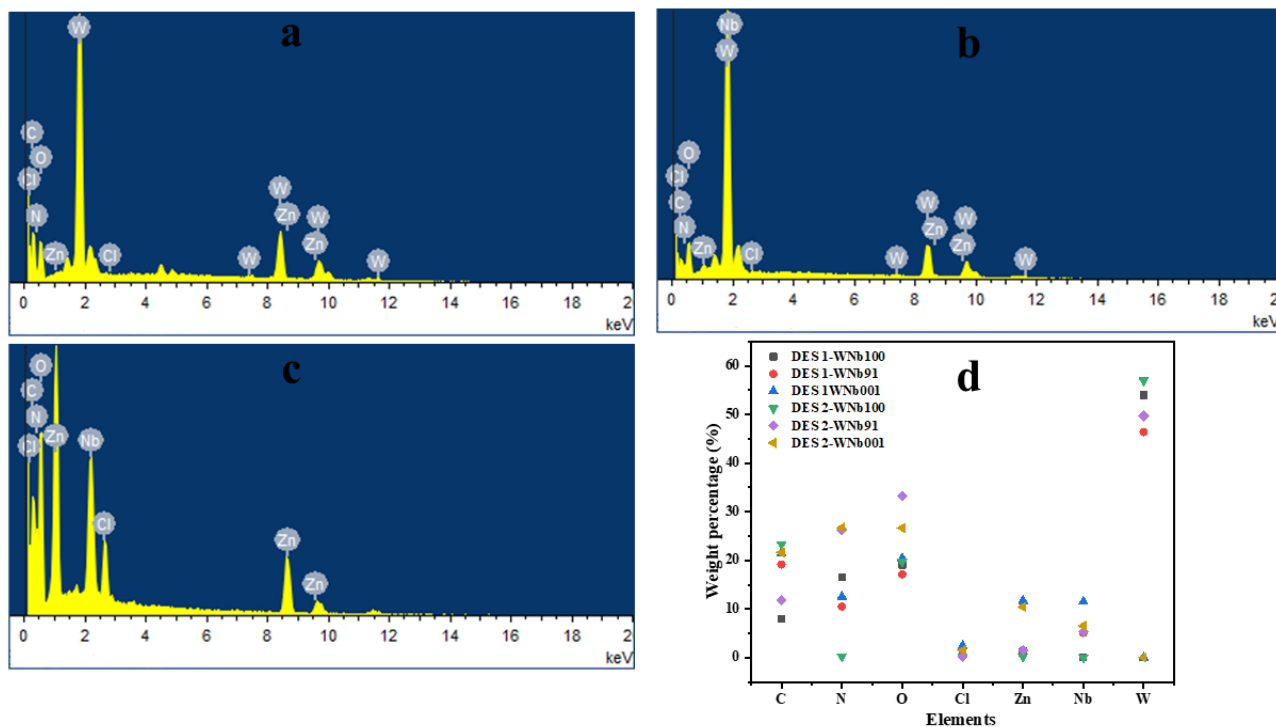

**Fig. S3** EDX spectra of (a) DES 2-WNb100 (b) DES 2-WNb91 (c) DES 2-WNb001 (d) Elemental plot showing the weight percent composition of the metallic complexes.

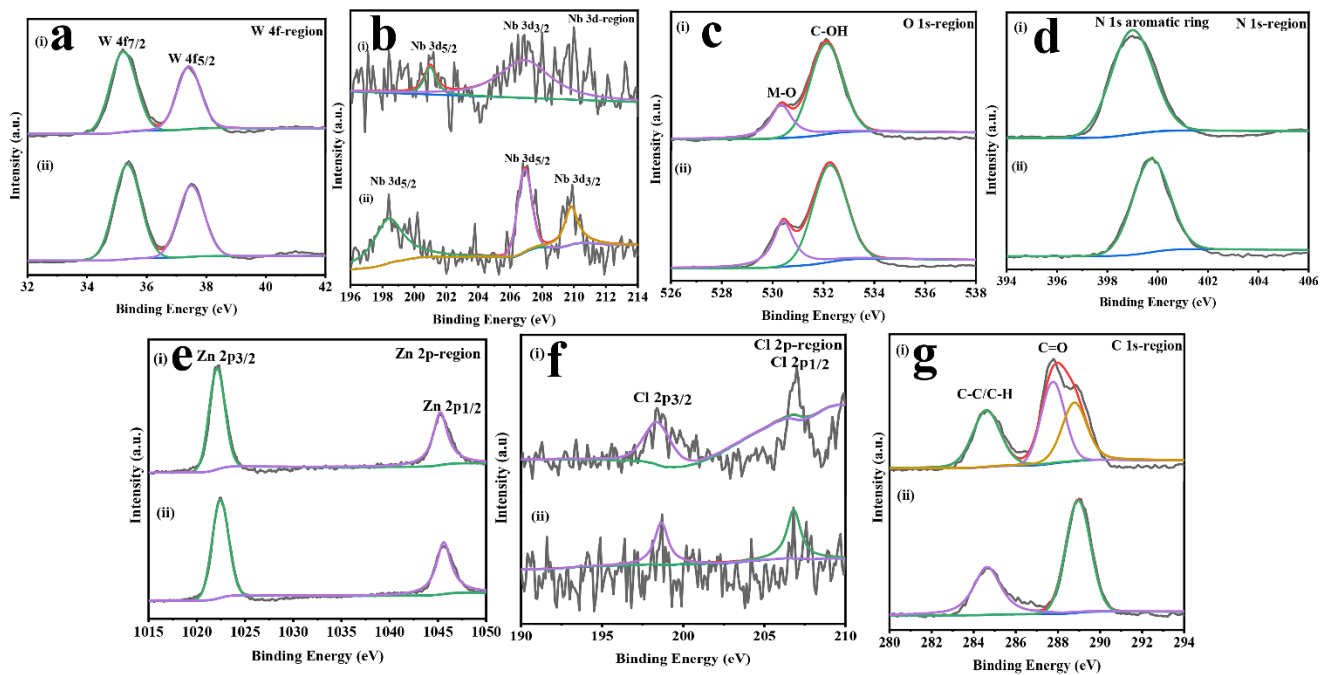

**Fig. S4** XPS scan spectra of (i) DES 1-WNb91 and (ii) DES 2-WNb91 displaying the (a) W 4f (b) Nb 3d (c) O 1s (d) N 1s (e) Zn 2p (f) Cl 2p and (g) C 1s regions before UV-light irradiation.

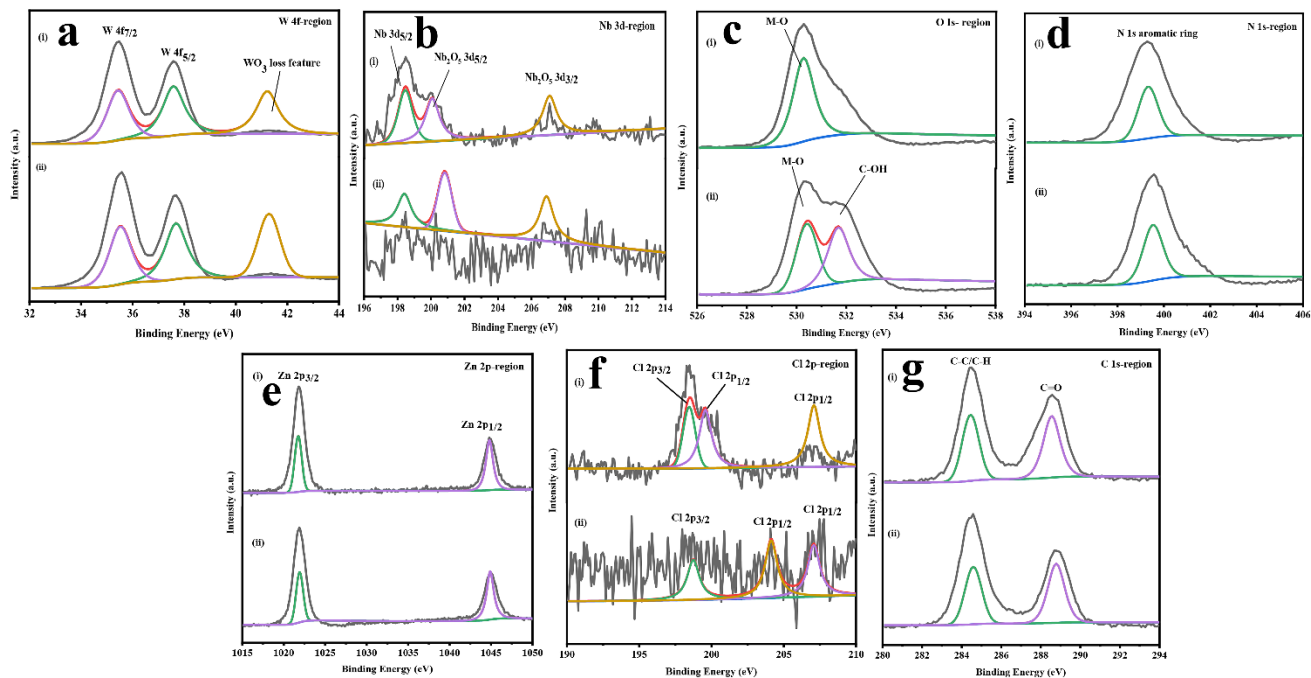

**Fig. S5** XPS scan spectra of (i) DES 1-WNb91 and (ii) DES 2-WNb91 displaying the (a) W 4f (b) Nb 3d (c) O 1s (d) N 1s (e) Zn 2p (f) Cl 2p and (g) C 1s regions after UV-light irradiation.

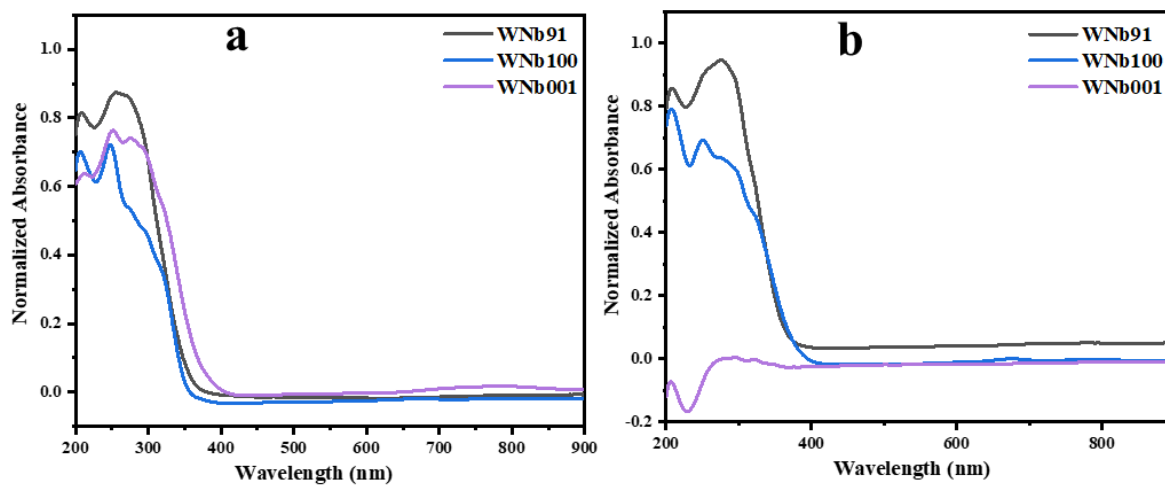

**Fig. S6** UV-Vis absorption spectra of (a) DES 1 (b) DES 2 based metallic complexes

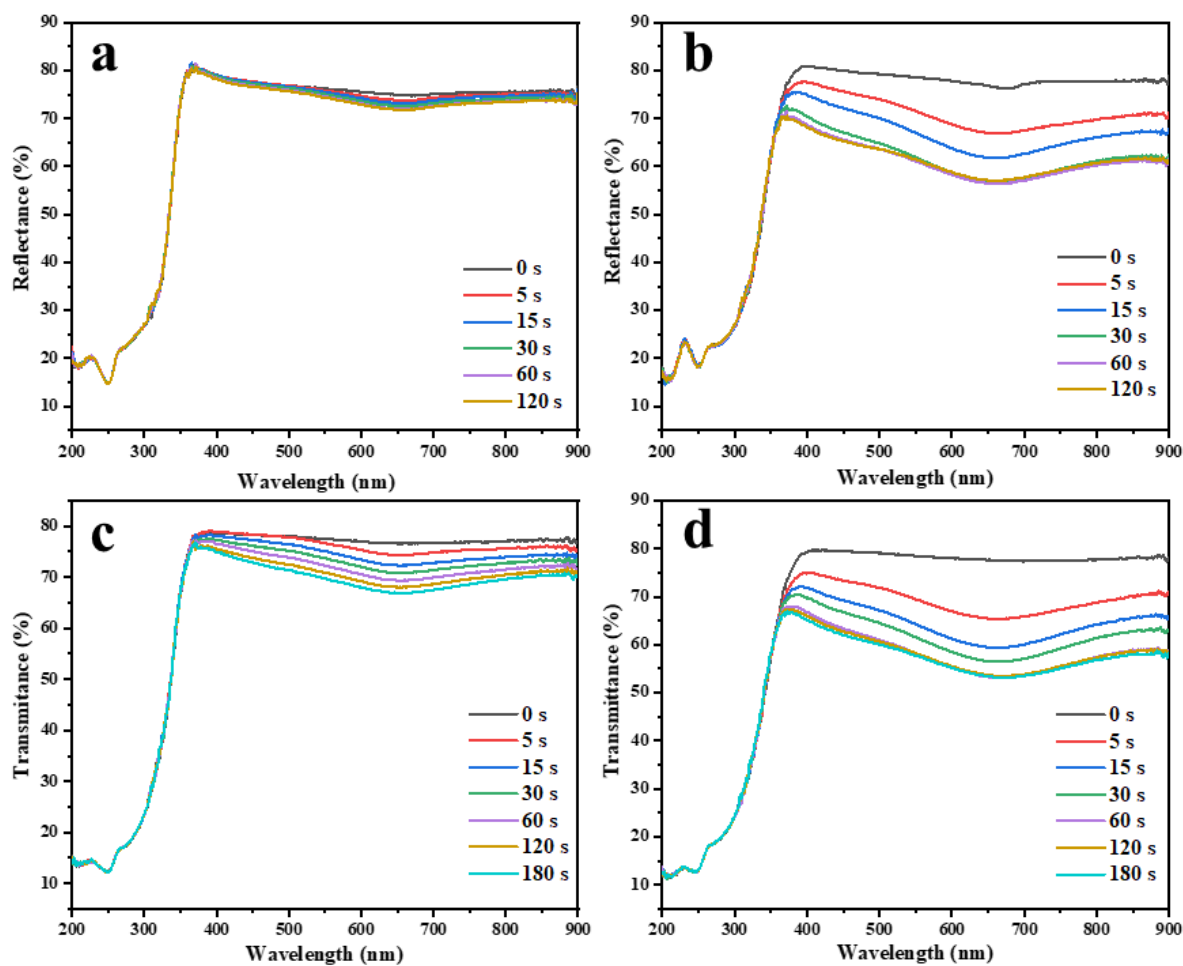

**Fig. S7** UV–Vis diffuse reflectance spectra of (a) DES 1-WNb91 (b) DES 2-WNb91 and UV–Vis diffuse transmittance spectra of (c) DES 1-WNb91 (d) DES 2-WNb91.

### References

- [1] H. Mou, J. Wang, D. Zhang, D. Yu, W. Chen, D. Wang, T. Mu, *J. Mater. Chem. A* **2019**, *7*, 5719–5725.
- [2] O. Oderinde, M. Kang, M. Kalulu, F. Yao, G. Fu, *Superlattices Microstruct.* **2019**, *125*, 103–112.
